# Supplementary material for: Protein-peptide molecular docking with large-scale conformational changes: the p53-MDM2 interaction
Source: PubMed Central journal article supplement (PMC5131342; doi:10.1038/srep37532), 2016-12-01

**Manuscript title:** Protein-peptide molecular docking with large-scale conformational changes: the p53-MDM2 interaction

**Authors:** Maciej Pawel Ciemny<sup>1,2,+</sup>, Aleksander Debinski<sup>1,+</sup>, Marta Paczkowska<sup>1</sup>, Andrzej Kolinski<sup>1</sup>, Mateusz Kurcinski<sup>1,\*</sup>, Sebastian Kmiecik<sup>1,\*</sup>

<sup>1</sup> University of Warsaw, Faculty of Chemistry, Warsaw 02-093, Poland

<sup>2</sup> University of Warsaw, Faculty of Physics, Warsaw, 02-093, Poland

\* mkurc@chem.uw.edu.pl, sekmi@chem.uw.edu.pl

+ these authors contributed equally to this work

## Supplementary information

**Supplementary Table S1.** Protein-peptide contacts. The table presents 30 most frequent protein-peptide contacts observed in the 10,000 frames of the CABS-dock simulation.

| p53 residue | MDM2 residue | Contact frequency |
|-------------|--------------|-------------------|
| Ser20       | Gly58        | 0.1378            |
| Phe19       | Met62        | 0.1072            |
| Phe19       | Gln72        | 0.0928            |
| Phe19       | Val93        | 0.0709            |
| Thr18       | Met62        | 0.0657            |
| Trp23       | His96        | 0.065             |
| Ser20       | Val8         | 0.0637            |
| Leu26       | His96        | 0.0628            |
| Lys24       | Val14        | 0.0532            |
| Trp23       | Lys94        | 0.0511            |
| Leu26       | Thr16        | 0.049             |
| Ser20       | Phe55        | 0.048             |
| Phe19       | Gly58        | 0.048             |
| Phe19       | His73        | 0.0433            |
| Ser20       | Pro9         | 0.0416            |
| Leu26       | Gly58        | 0.0414            |
| Ser20       | Met62        | 0.0374            |
| Asp21       | Asp11        | 0.0371            |
| Asp21       | Pro9         | 0.0342            |
| Leu25       | Lys94        | 0.0339            |
| Thr18       | Asp11        | 0.0337            |
| Leu26       | Val14        | 0.0331            |
| Trp23       | Gln59        | 0.0331            |
| Leu26       | Val93        | 0.0331            |
| Trp23       | Gly58        | 0.0328            |
| Phe19       | Phe55        | 0.0324            |
| Leu22       | Gln71        | 0.0309            |
| Ser20       | His96        | 0.0306            |
| Leu25       | His73        | 0.0293            |
| Lys24       | Gly12        | 0.0285            |

**Supplementary Table S2.** Intramolecular lid-receptor contacts. The table presents 30 most frequent lid-protein contacts observed in the 10,000 frames of the CABS-dock simulation.

| MDM2 residues |        | Contact frequency |
|---------------|--------|-------------------|
| Leu27         | Thr49  | 0.2189            |
| Leu27         | Met50  | 0.2122            |
| Met1          | Phe55  | 0.0825            |
| Leu27         | Pro30  | 0.0754            |
| Thr26         | Thr49  | 0.0506            |
| Thr26         | Met50  | 0.0436            |
| Ile19         | Arg97  | 0.0421            |
| Met1          | Lys51  | 0.039             |
| Glu25         | Met50  | 0.038             |
| Met6          | Lys94  | 0.0317            |
| Glu25         | Thr49  | 0.0305            |
| Ile19         | Gln112 | 0.0277            |
| Thr26         | Arg29  | 0.0222            |
| Leu27         | Tyr28  | 0.0179            |
| Thr4          | Lys94  | 0.0173            |
| Gln24         | Met50  | 0.0165            |
| Val8          | Phe55  | 0.0163            |
| Ile19         | Thr101 | 0.0155            |
| Glu23         | Lys51  | 0.0149            |
| Thr26         | Pro30  | 0.0146            |
| Glu23         | Gln112 | 0.014             |
| Ser7          | Lys94  | 0.0125            |
| Thr15         | Glu95  | 0.0123            |
| Ser22         | Lys51  | 0.012             |
| Thr4          | His73  | 0.0119            |
| Val8          | Glu95  | 0.0119            |
| Thr4          | Gln72  | 0.0118            |
| Thr16         | Glu95  | 0.0116            |
| Asn5          | Lys94  | 0.0114            |
| Ser17         | Arg97  | 0.0111            |

**Supplementary Figure S1.** CABS-dock energy versus the fraction of native receptor-peptide contacts ( $N_C$ ) observed in the 10,000 frames of the CABS-dock simulation. The contacts are derived using cut-off distance value of  $8\text{\AA}$  (based on center of the mass positions of the side chains). The graph shows that the structures with higher fraction of native contacts tend to lower CABS energy values.

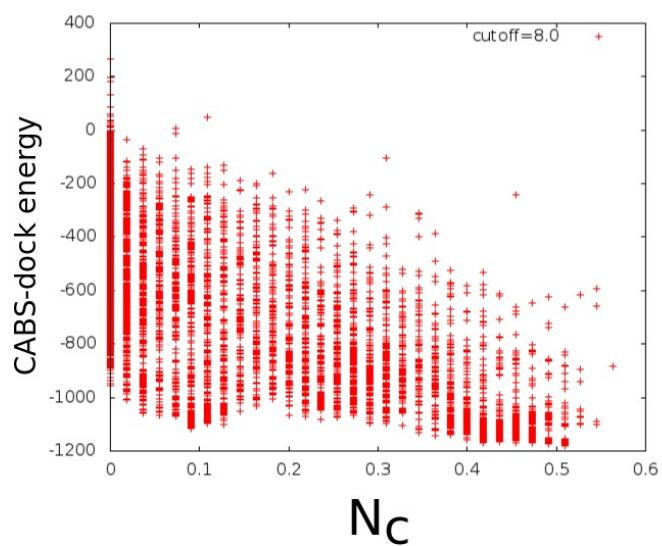

Supplement: srep37532-s1.pdf [file srep37532-s1.pdf]
